# Supplementary material
Source: publisher figshare collection journal article supplement (https://karger.figshare.com/ndownloader/files/10647808)
Supplement: Supplementary file 1 [file 10647808]

**A.**

| Classification of papuloerythroderma according to etiology                                                                                                                |
|---------------------------------------------------------------------------------------------------------------------------------------------------------------------------|
| Papuloerythroderma of Ofuji (primary idiopathic papuloerythroderma)                                                                                                       |
| Secondary papuloerythroderma<br>Atopic papuloerythroderma<br>Paraneoplastic papuloerythroderma<br>Infection-induced papuloerythroderma<br>Drug-induced papuloerythroderma |
| Papuloerythroderma-like/Deck chair sign positive CTCL                                                                                                                     |
| Pseudopapuloerythroderma                                                                                                                                                  |

**B.**

| PEO Diagnostic criteria                                                                                                                                                                                                                                                                                                                                                         |
|---------------------------------------------------------------------------------------------------------------------------------------------------------------------------------------------------------------------------------------------------------------------------------------------------------------------------------------------------------------------------------|
| Core criteria<br>1. Erythroderma-like eruption with flat-topped papules, red-to-brown in colour and with a cobblestone appearance<br>2. Sparing of the skin folds and creases (deck chair sign)<br>3. Itch<br>4. Histopathological exclusion of CTCL and other recognized skin diseases<br>5. Workup to exclude malignancy, infection, drugs and/or atopy as a causative factor |
| Additional criteria<br>• Age greater than 55 years<br>• Male gender<br>• Peripheral and/or tissue eosinophilia<br>• Peripheral lymphopenia<br>• Increased serum IgE                                                                                                                                                                                                             |
| Description of criteria<br>• Criteria 1-5: PEO, or primary idiopathic papuloerythroderma<br>• Criteria 1-4: Secondary papuloerythroderma<br>• Criteria 1-3, 5: Papuloerythroderma-like CTCL                                                                                                                                                                                     |

**Supplementary Table 1. A.** Classification of papuloerythroderma according to etiology, adapted from Torchia et al. and **B.** Proposed PEO Diagnostic criteria, adapted from Torchia et al.[5]
